# Supplementary material for: Clonal evolution and KRAS-MET coamplification during secondary resistance to EGFR-targeted therapy in metastatic colorectal cancer
Source: PubMed Central journal article supplement — ESMO Open. 2016 Aug 4;1(4):e000079. doi: 10.1136/esmoopen-2016-000079 (PMC5070243; doi:10.1136/esmoopen-2016-000079), 2016-08-04

Supplementary Figure 1 - Quantitative polymerase chain reaction (qPCR) analysis of MET and KRAS.

Representative data from KRAS (A) and MET (B) relative gene quantification (RQ) in the three metastatic sites (liver, retroperitoneum and ureteral lesion) using TaqMan Copy Number Assay. The number of copies of the KRAS and MET genes is determined by relative quantification using the comparative CT (ΔΔCT) method. MAD1L1 and IL22 genes, respectively on chromosome 7 and 12, were used as reference genes to exclude a potential polysomy.

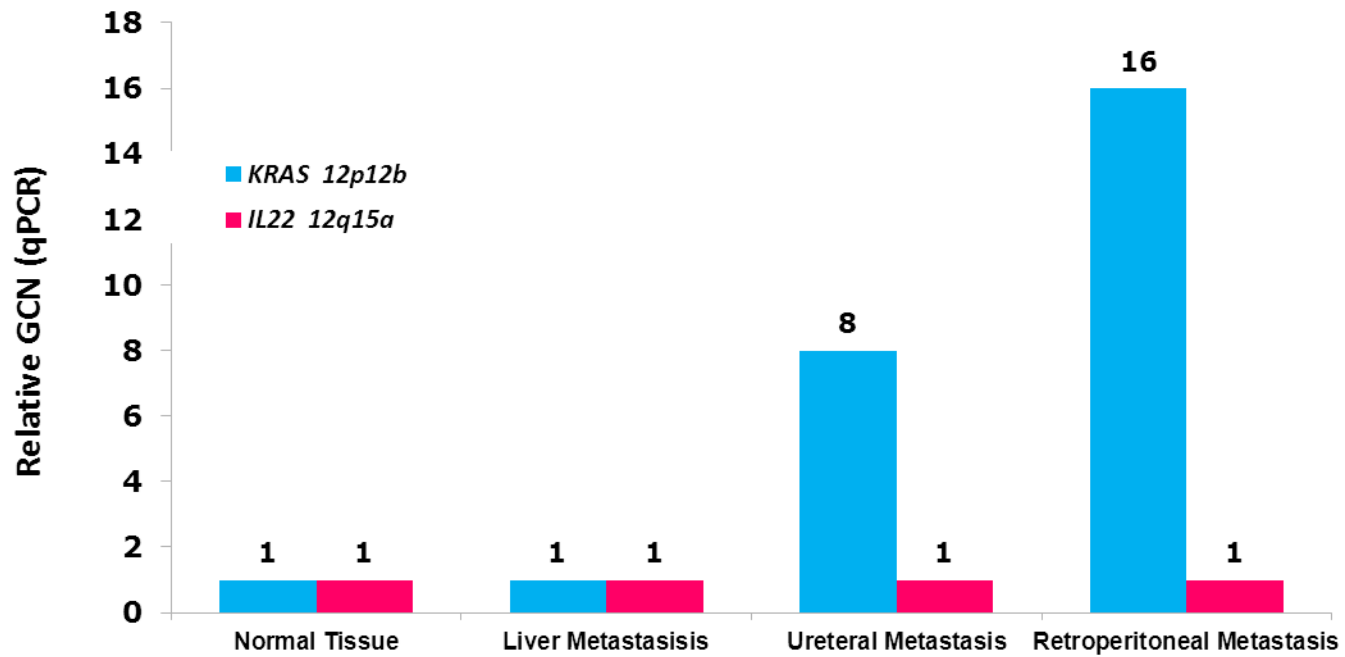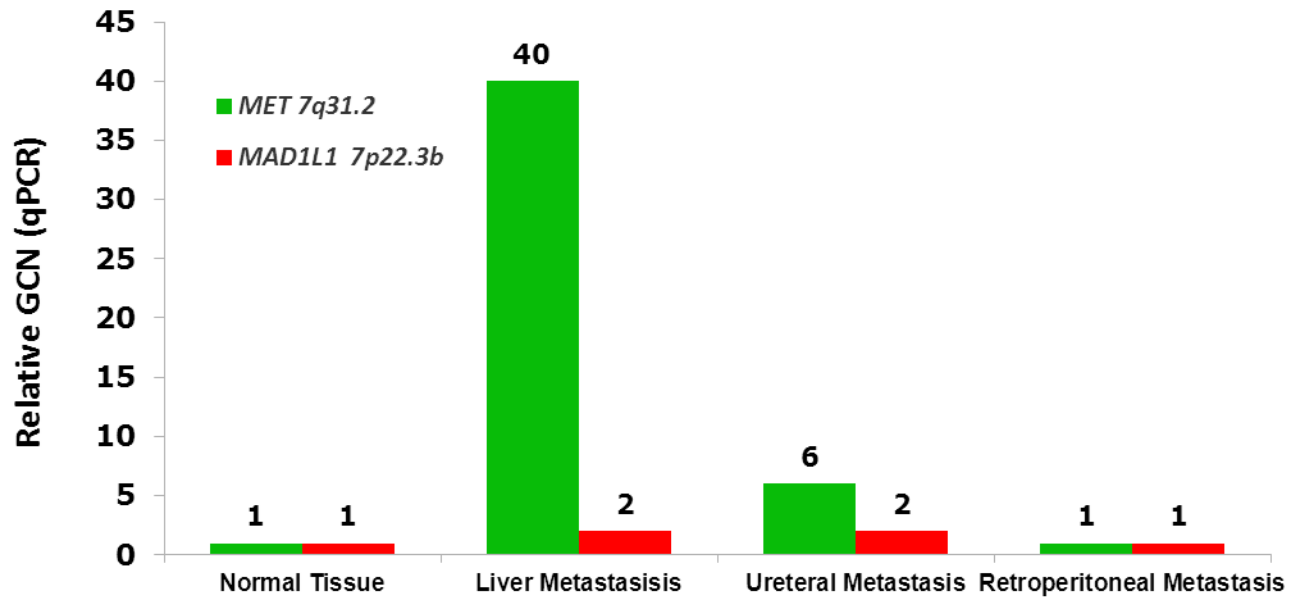

Supplement: esmoopen-2016-000079supp_figure.pdf [file esmoopen-2016-000079supp_figure.pdf]
